# Supplementary material
Source: publisher figshare collection journal article supplement (https://future-science-group.figshare.com/ndownloader/files/34397084)
Supplement: Supplementary file 1 [file 34397084]

**Table S1.** Primer sequences for real-time PCR

| Target gene | Forward | Reverse |
| --- | --- | --- |
| *Runx2* | CGTATTTCAGATGATGACACTGCC | AAATGCCTGGGAACTGCCTG |
| *Sp7* | GAGGCCTTTCGTCTGCAACT | CAAGTGGTCGCTTCGGGTA |
| *Alp* | TACTGCTGATCACTCCCACG | ACCGTCCACCACCTTGTAAC |
| *Bglap* | GCATTCTGCCTCTCTGACCTG | CCGGAGTCTATTCACCACCTTAC |
| *Ibsp* | AGACTGCTTTAATCTTGCTCTGC | GTAGCGTGGCCGGTACTTA |
| *Opg* | TCGCAAGAGCAAACTTTCCAG | GCTTTCACAGAGGTCAATGTCTTG |
| *Rankl* | ACATCCCATCGGGTTCCCA | AGCAAATGTTGGCGTACAGGT |
| *Rank* | AGCTCAACATCCCTTGCAGC | GTCCCTTGGTGTGCTTCCAT |
| *Eif2b1* | TGCTGTTGGCTATATCATGGAGA | TGCAACCACATAGAAGGGCT |
